# Supplementary material for: A Phase Ib Study Assessing the Safety, Tolerability, and Efficacy of the First-in-Class Wee1 Inhibitor Adavosertib (AZD1775) as Monotherapy in Patients with Advanced Solid Tumors
Source: PubMed Central journal article supplement — Target Oncol. 2023 Jun 6;18(4):517–30. doi: 10.1007/s11523-023-00965-7 (PMC10345044; doi:10.1007/s11523-023-00965-7), 2023-06-06
Supplement: 11523_2023_965_MOESM1_ESM.pdf [file 11523_2023_965_MOESM1_ESM.pdf]

## Supplementary Material

### **A Phase Ib Study Assessing the Safety, Tolerability, and Efficacy of the First-in-Class Wee1 Inhibitor Adavosertib (AZD1775) as Monotherapy in Patients with Advanced Solid Tumors**

Todd M. Bauer<sup>1,2</sup>, Kathleen N. Moore<sup>1,3</sup>, Janet S. Rader<sup>4</sup>, Fiona Simpkins<sup>5</sup>, Alain C. Mita<sup>6</sup>, J. Thaddeus Beck<sup>7</sup>, Lowell Hart<sup>8</sup>, Quincy Chu<sup>9</sup>, Amit Oza<sup>10</sup>, Anna V. Tinker<sup>11</sup>, Esteban Rodrigo Imedio<sup>12\*</sup>, Sanjeev Kumar<sup>12</sup>, Ganesh Mugundu<sup>13\*</sup>, Suzanne Jenkins<sup>12</sup>, Juliann Chmielecki<sup>14\*</sup>, Suzanne Jones<sup>1</sup>, David Spigel<sup>1,2</sup>, Siqing Fu<sup>15</sup>

<sup>1</sup>Sarah Cannon Research Institute, Nashville, TN, USA; <sup>2</sup>Tennessee Oncology, PLLC, Nashville, TN, USA; <sup>3</sup>Stephenson Cancer Center at the University of Oklahoma, Oklahoma City, OK, USA; <sup>4</sup>Medical College of Wisconsin, Milwaukee, WI, USA; <sup>5</sup>Abramson Cancer Center, University of Pennsylvania, Philadelphia, PA, USA; <sup>6</sup>Samuel Oschin Comprehensive Cancer Institute at Cedars-Sinai Medical Center, Los Angeles, CA, USA; <sup>7</sup>Highlands Oncology Group, Springdale, AR, USA; <sup>8</sup>Sarah Cannon Research Institute, Fort Myers, FL, USA; <sup>9</sup>University of Alberta Cross Cancer Institute, Edmonton, Canada; <sup>10</sup>Princess Margaret Cancer Centre, Toronto, Canada; <sup>11</sup>BC Cancer, Vancouver, Canada; <sup>12</sup>Precision Medicine and Biosamples, R&D, AstraZeneca, Cambridge, UK; <sup>13</sup>Clinical Pharmacology and Quantitative Pharmacology, Clinical Pharmacology and Safety Sciences, AstraZeneca, Boston, MA, USA; <sup>14</sup>Translational Medicine, Oncology Research and Early Development, AstraZeneca, Boston, MA, USA; <sup>15</sup>The University of Texas MD Anderson Cancer Center, Houston, TX, USA

\*Author is no longer an employee of AstraZeneca

#### **Corresponding author:**

**Siqing Fu, The University of Texas MD Anderson Cancer Center, Houston, TX 77030, USA.**

**Phone: 713-792-4318; e-mail: [siqingfu@mdanderson.org](mailto:siqingfu@mdanderson.org)**

**Supplementary Figure S1.** Patient disposition across Part A (safety lead-in) and Part B (expansion cohorts)

**Part A**

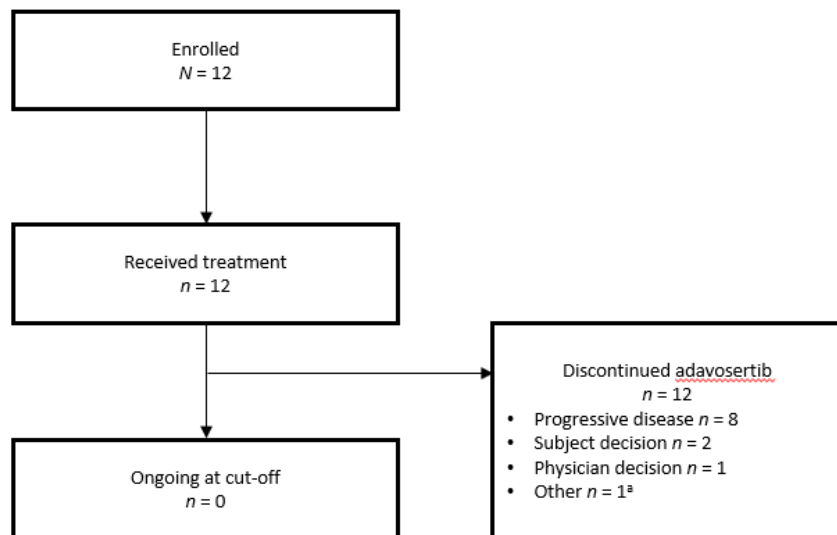

**Part B**

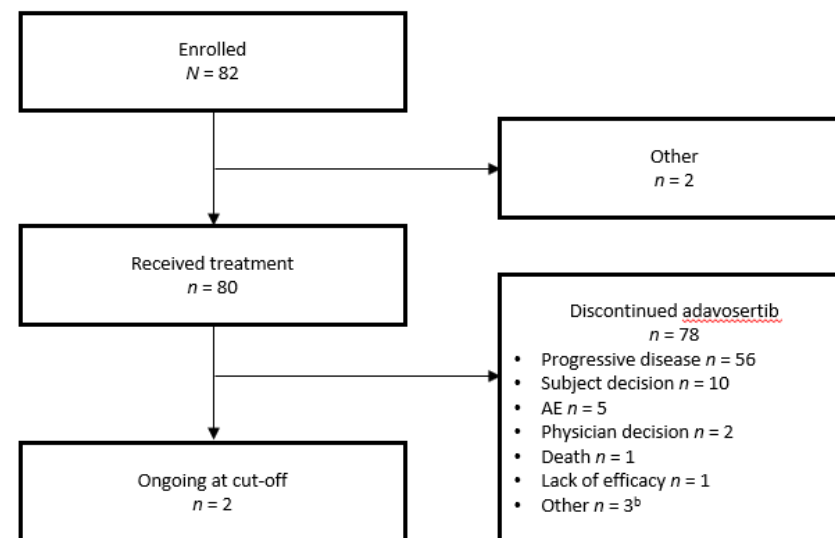

<sup>a</sup>Lost to follow-up as a result of issues with insurance; <sup>b</sup>One patient in the TNBC, biomarker-negative cohort (increased worsening of AEs and increase in tumoral markers) and two in the ovarian cancer BRCAm, PARPi failure cohort (clinical progression). AE adverse event, BRCAm breast cancer gene 1/2 mutation, N number of patients enrolled, n number of patients, PARPi poly(ADP-ribose) polymerase inhibitor, TNBC triple-negative breast cancer

**Supplementary Figure S2. Progression-free survival (PFS) across all tumor types**

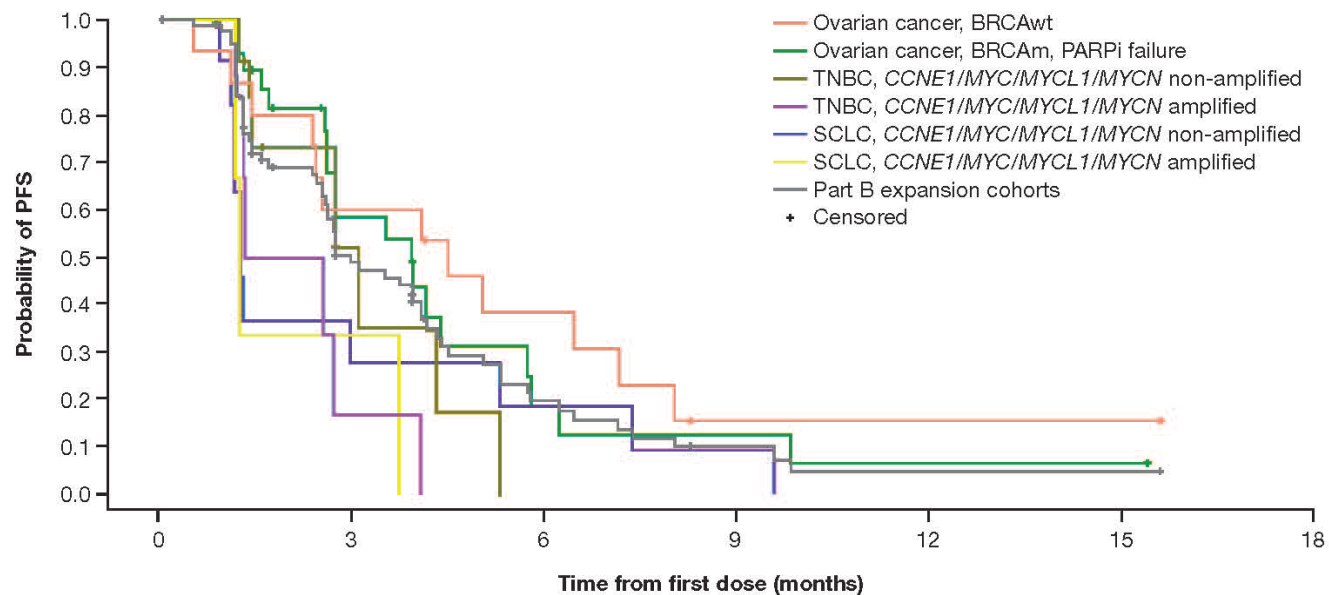

|                                                  | 0  | 3  | 6  | 9 | 12 | 15 | 18 |
|--------------------------------------------------|----|----|----|---|----|----|----|
| Ovarian cancer, BRCAwt: 16/12*                   | 16 | 9  | 5  | 1 | 1  | 1  | 0  |
| Ovarian cancer, BRCAm, PARPi failure: 30/19*     | 30 | 12 | 3  | 2 | 1  | 1  | 0  |
| TNBC, CCNE1/MYC/MYCL1/MYCN non-amplified: 13/8*  | 13 | 3  | 0  |   |    |    |    |
| TNBC, CCNE1/MYC/MYCL1/MYCN amplified: 6/6*       | 6  | 1  | 0  |   |    |    |    |
| SCLC, CCNE1/MYC/MYCL1/MYCN non-amplified: 12/11* | 12 | 3  | 2  | 1 | 0  |    |    |
| SCLC, CCNE1/MYC/MYCL1/MYCN amplified: 3/3*       | 3  | 1  | 0  |   |    |    |    |
| Part B expansion cohorts: 80/59*                 | 80 | 29 | 10 | 4 | 2  | 2  | 0  |

\*Number of patients in the full analysis set/number of events. *BRCAm* breast cancer gene 1/2 mutation, *BRCAwt* breast cancer gene 1/2 wild type, *CCNE1* cyclin E1, *PARPi* poly(ADP-ribose) polymerase inhibitor, *SCLC* small-cell lung cancer, *TNBC* triple-negative breast cancer

**Supplementary Figure S3.** Waterfall plot of target lesion size and best percentage change from baseline in all cohorts (full analysis set)

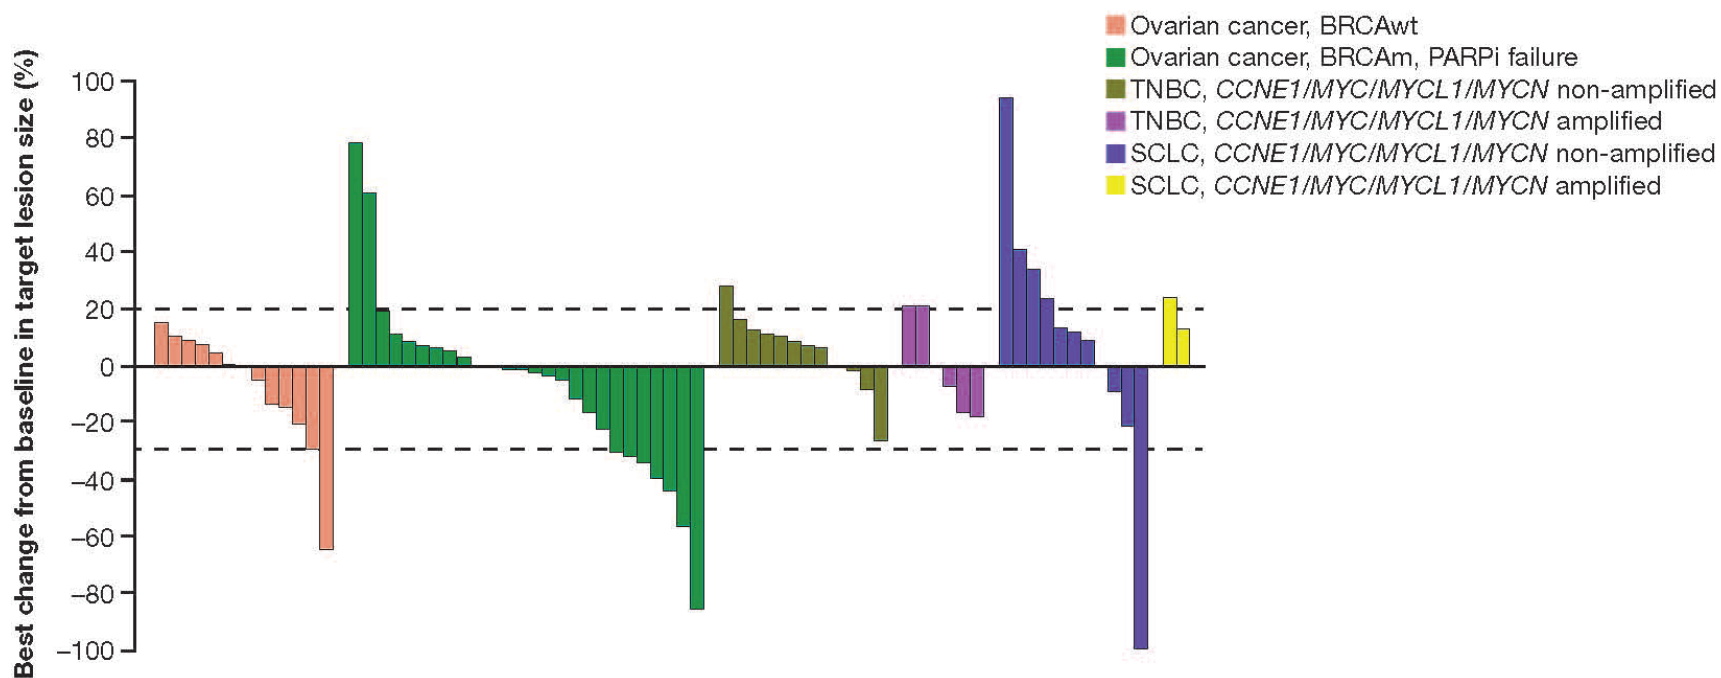

RECIST version 1.1 partial response:  $\geq 30\%$  decrease in the sum of diameters of target lesions, taking as reference the baseline sum diameters; progressive disease:  $\geq 20\%$  increase in the sum of diameters of target lesions, taking as reference the smallest sum on study. *BRCAm* breast cancer gene 1/2 mutation, *BRCAwt* breast cancer gene 1/2 wild type, *CCNE1* cyclin E1, *PARPi* poly(ADP-ribose) polymerase inhibitor, *SCLC* small-cell lung cancer, *TNBC* triple-negative breast cancer

**Supplementary Figure S4.** Clinical pharmacokinetics

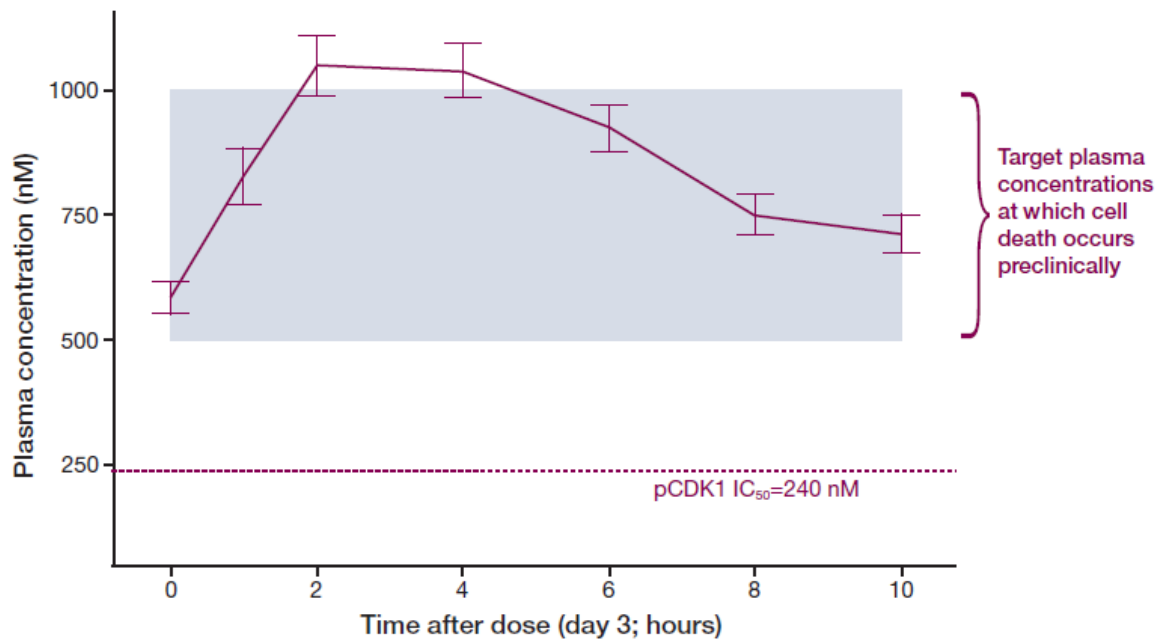

Plasma concentrations of adavosertib at 175 mg bid (day 3 exposure, geometric mean  $\pm$  standard deviation). *bid* twice a day,  $IC_{50}$  half-maximal inhibitory concentration, *pCDK1* phosphorylated cyclin-dependent kinase 1
